# Supplementary material for: Mechanofusion-derived Si-alloy/graphite composite electrode materials for Li-ion batteries
Source: Royal Society of Chemistry journal article supplement (doi:10.1039/c9ta00132h), 2019-01-01
Supplement: c9ta00132h1.pdf [file c9ta00132h1.pdf]

Supplementary Information for

## **Mechanofusion-Derived Si-alloy/Graphite Composite Electrode Materials for Li-ion Batteries**

Yidan Cao<sup>a,b</sup>, T. D. Hatchard<sup>b</sup>, R.A. Dunlap<sup>a,c,d</sup>, and M.N. Obrovac<sup>a,b,c,\*</sup>

<sup>a</sup> *Department of Physics and Atmospheric Science, Dalhousie University, Halifax, Nova Scotia B3H 4R2, Canada*

<sup>b</sup> *Department of Chemistry, Dalhousie University, Halifax, Nova Scotia B3H 4R2, Canada*

<sup>c</sup> *Clean Technologies Research Institute, Dalhousie University, Halifax, Nova Scotia B3H 4R2, Canada*

<sup>d</sup> *College of Sustainability, Dalhousie University, Halifax, Nova Scotia B3H 4R2, Canada*

\* - First author: yidancoo@dal.ca, - Corresponding author: mnobrovac@dal.ca

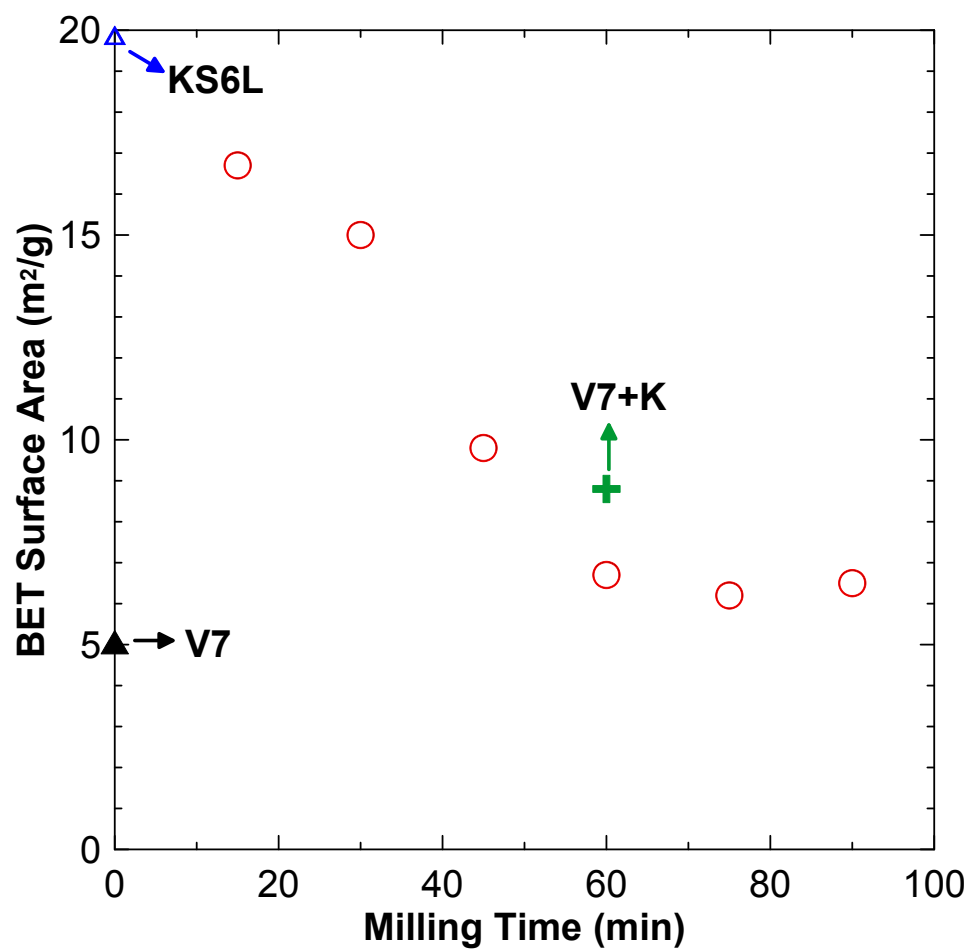

Figure S1 BET surface area of samples.

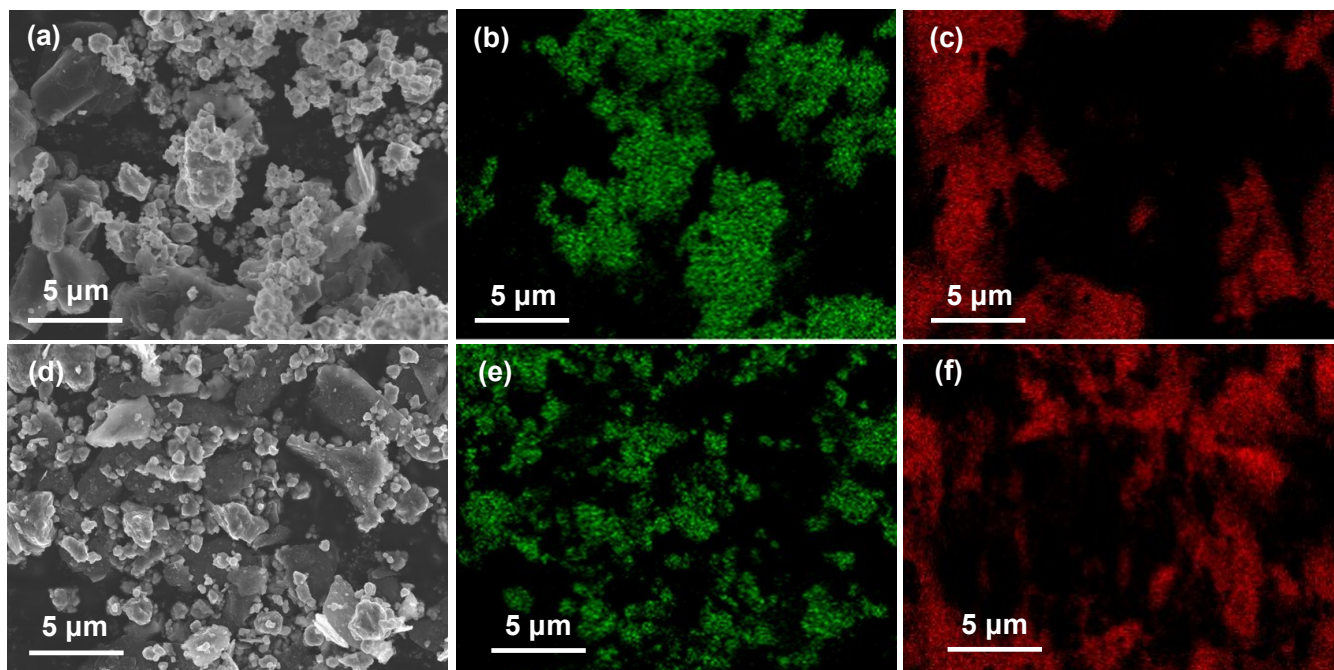

Figure S2 SEM image (a) and corresponding EDS mapping of Si (b) and C (c) elements in planetary milled V7+K. The V7 alloy particles and KS6L graphite flakes are still agglomerated. SEM image (d) and corresponding EDS mapping of Si (e) and C (f) elements in Mechanofusion dry processed VK30 composite. The alloy particles are broken down to small primary particles and dispersed uniformly.

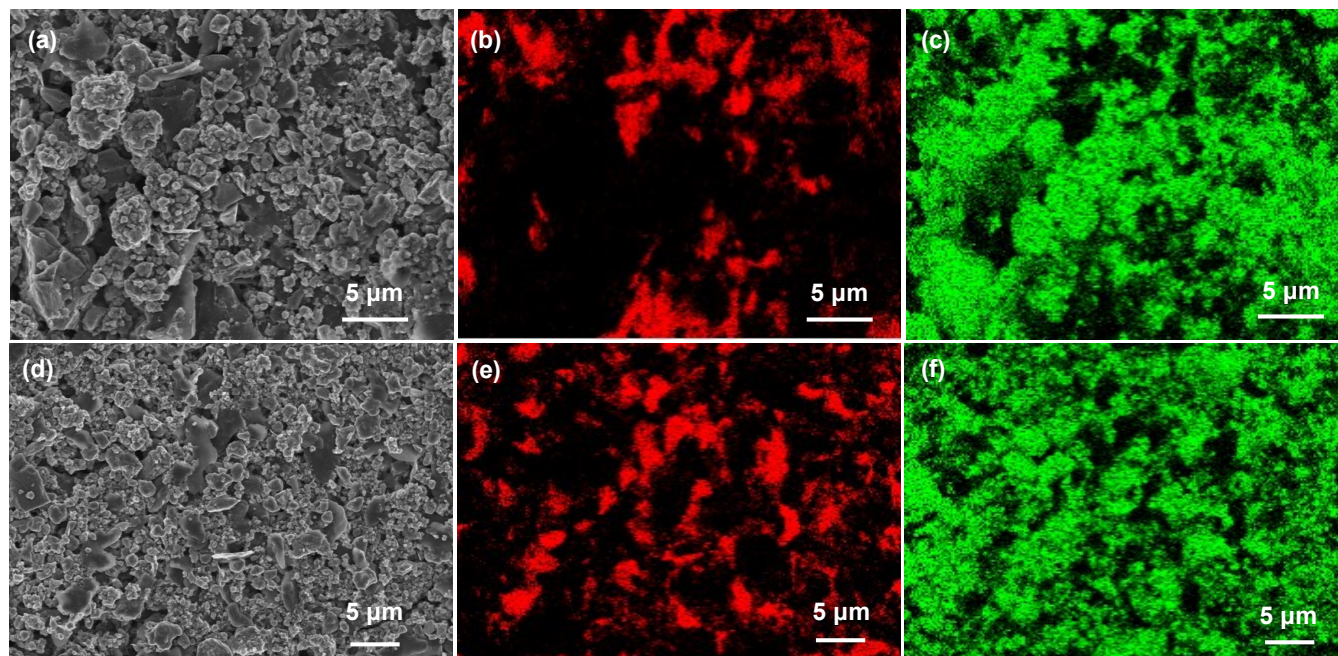

Figure S3 SEM image (a) and corresponding EDS mapping of C (b), Si (c) elements in uncalendered V7+K electrode; SEM image (d) and corresponding EDS mapping of C (e), Si (f) elements in uncalendered VK60 electrode. The dispersions of V7 alloy particles and graphite are better in MF processed VK sample than those in planetary milled V7+K sample.

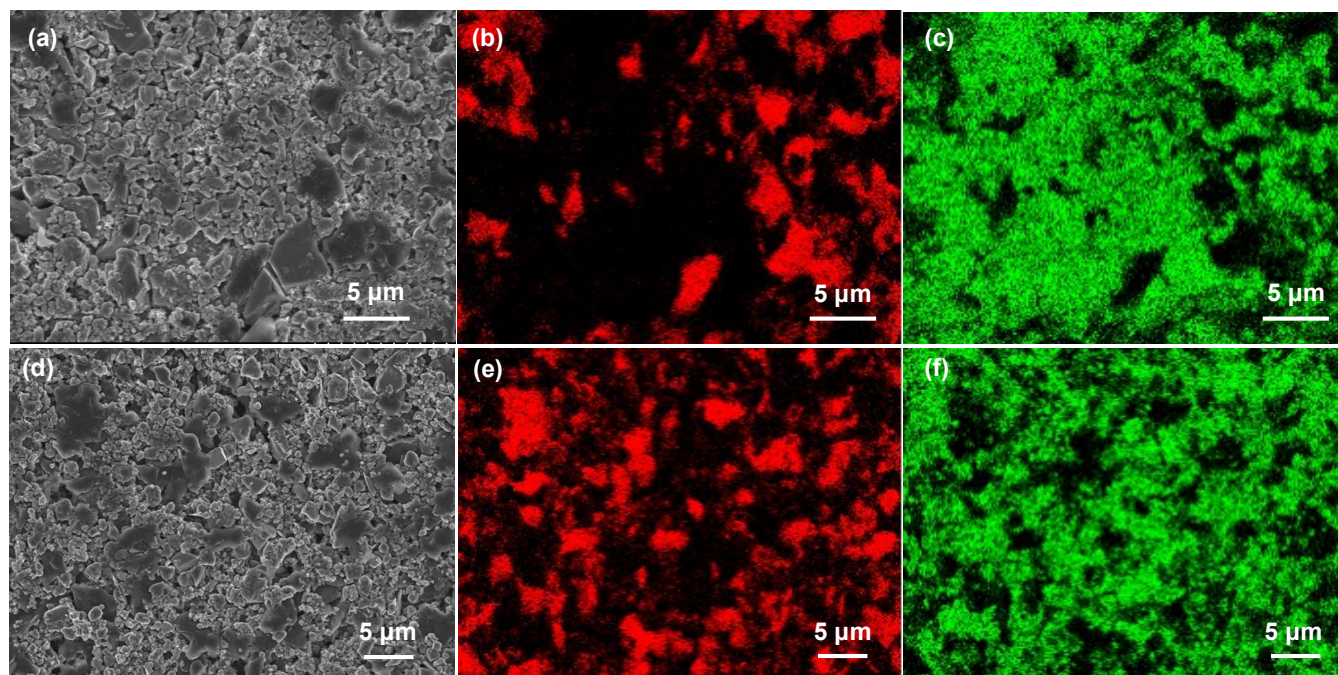

Figure S4 SEM image (a) and corresponding EDS mapping of C (b), Si (c) elements in calendered V7+K electrode; SEM image (d) and corresponding EDS mapping of C (e), Si (f) elements in calendered VK60 electrode. The dispersions of V7 alloy particles and graphite are better in MF processed VK sample than those in planetary milled V7+K sample.

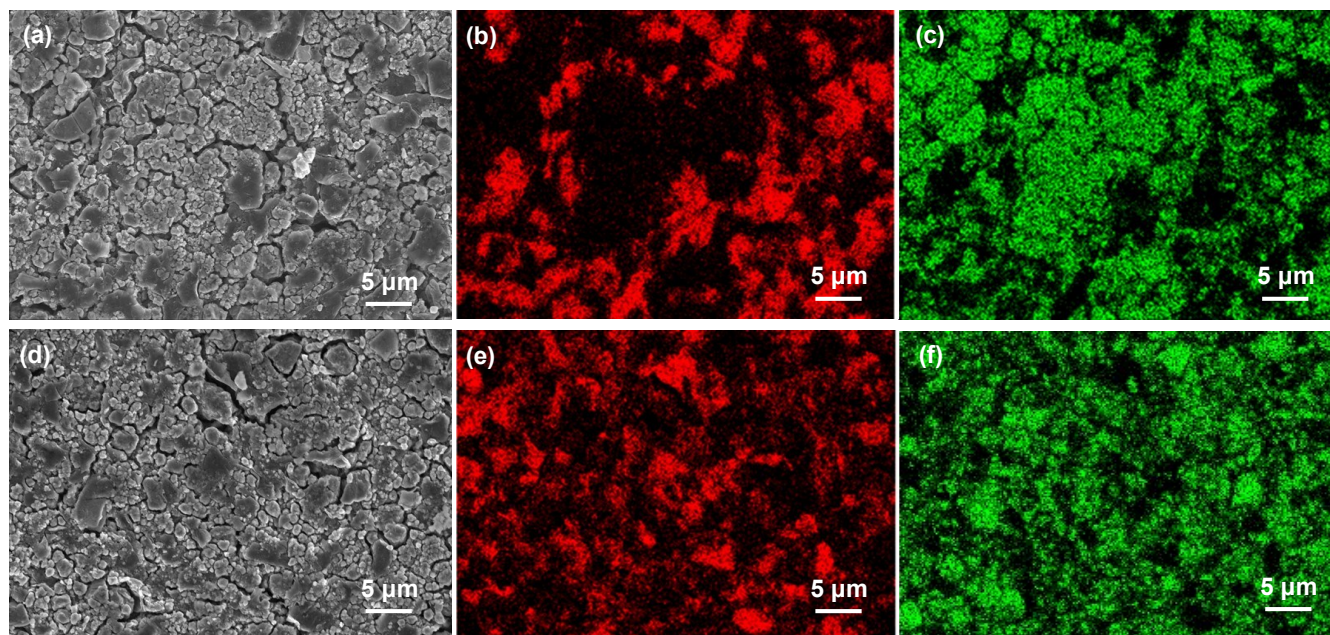

Figure S5 SEM image (a) and corresponding EDS mapping of C (b), Si (c) elements in V7+K-c electrode after 50 discharge/charge cycles; SEM image (d) and corresponding EDS mapping of C (e), Si (f) elements in VK60-c electrode after 50 discharge/charge cycles. Less cracks and pulverization are observed in VK electrode compared to V7+K electrode.

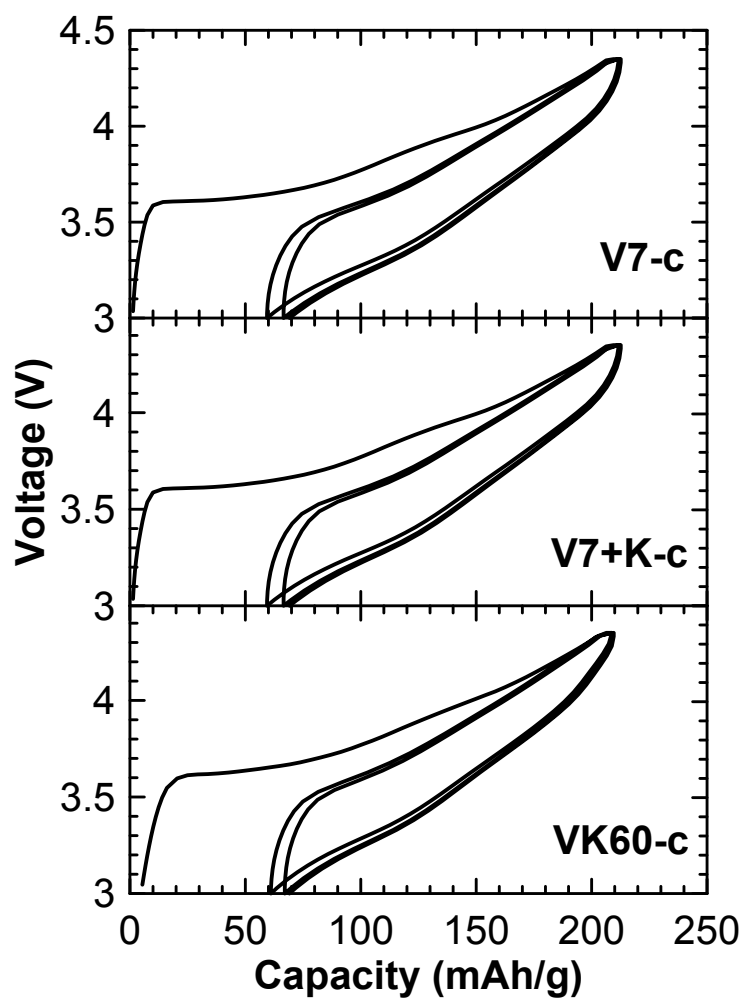

Figure S6 Voltage curves of full cells.
